# Supplementary material
Source: HighWire-hosted journal article supplement (https://bmjopen.bmj.com/content/11/7/e049238)
Supplement: inline-supplementary-material-1 [file inline-supplementary-material-1.pdf]

| Formal Feasibility Criteria              |                                                                                                                                                       |
|------------------------------------------|-------------------------------------------------------------------------------------------------------------------------------------------------------|
| Trial Recruitment                        | Description                                                                                                                                           |
| Access Routes                            | Investigation of the open recruitment strategy                                                                                                        |
| Study flow                               | Investigation of the gap between expression of interest and trial uptake; participation rate (at least 70% of all eligible patients can be recruited) |
| Baseline characteristics of participants | Clinically relevant psychological distress in participants                                                                                            |
| Acceptability                            | Description                                                                                                                                           |
| Acceptability of internet interventions  | Cognitively based attitude towards internet interventions (APOI)                                                                                      |
| Treatment satisfaction                   | Satisfaction with the internet intervention (CSQ-8)                                                                                                   |
| Formative feedback                       | User-Feedback on intervention contents on minddistrict®                                                                                               |
| Negative effects                         | Negative effects attributed to ACTonDiabetes (INEP)                                                                                                   |
| Protocol Adherence                       | Intervention adherence                                                                                                                                |
| Outcome data                             | Description                                                                                                                                           |
| Potential effectiveness                  | Potential of the intervention to affect likely outcomes of a confirmatory trial (PAID, PHQ-9, GAD-7, AQoL-8D, DSMQ, AADQ, FoP-Q-SF).                  |

Notes. APOI = Attitudes towards psychological online interventions questionnaire; INEP = Inventory for the assessment of negative effects of psychotherapy; CSQ-8=Client Satisfaction Questionnaire. PAID = Problem Areas In Diabetes Scale; PHQ-9 = Patient Health Questionnaire-9; GAD-7 = Generalized Anxiety Disorder 7-item Scale; DSMQ = Diabetes Self-Management Questionnaire; AADQ = Acceptance and Action Diabetes Questionnaire; AQoL-8D = Assessment of Quality of Life 8-item Questionnaire; FoP-Q-SF = Fear of Progression Questionnaire–Short Form.
